# Supplementary material for: Renewable aromatic hydrocarbons from waste cooking oil over hierarchical imidazole supported zeolites
Source: Royal Society of Chemistry journal article supplement (doi:10.1039/d4ta00416g), 2024-01-01
Supplement: d4ta00416g1.pdf [file d4ta00416g1.pdf]

# Supporting Information

## Renewable Aromatic Hydrocarbons from Waste Cooking Oil over Hierarchical Imidazole Supported Zeolites

Bhanu Joshi,<sup>a,b</sup> Omvir Singh,<sup>a,e\*</sup> Ankit Agrawal,<sup>a,b</sup> Neha Dhiman,<sup>a,b</sup> Bhanu Prasad Vempatapu,<sup>c</sup> Navin Gopinathan,<sup>d</sup> Anjan Ray,<sup>a,b</sup> and Bipul Sarkar<sup>\*a,b</sup>

<sup>a</sup> Upstream & Wax Rheology Division, CSIR- Indian Institute of Petroleum, Haridwar Road, Dehradun-248005, India

Email: [bsarkar@iip.res.in](mailto:bsarkar@iip.res.in)

<sup>b</sup> Academy of Scientific and Innovative Research (AcSIR), CSIR-HRDC Campus, Ghaziabad-201002, India

<sup>c</sup> Analytical Sciences Division, CSIR- Indian Institute of Petroleum, Haridwar Road, Dehradun-248005, India

<sup>d</sup> Department of Chemical Engineering, Indian Institute of Technology Ropar, Rupnagar, Punjab - 140001, India

<sup>e</sup> Department of Sciences & Humanities, Rajiv Gandhi Institute of Petroleum Technology (RGIPT)-Jais, Amethi, Uttar Pradesh 229304, India

### Table of contents

| Figures    |                                                            | Page no |
|------------|------------------------------------------------------------|---------|
| Figure S1  | Pore diameter of fresh and spent ZnCr/ISZ catalyst.        | 3       |
| Figure S2  | SEM images of (a,b)fresh and (c,d) spent ZnCr/ISZ catalyst | 3       |
| Figure S3  | EDX spectrum of ZnCr/ISZ catalyst                          | 4       |
| Figure S4  | EDX spectrum of spent ZnCr/ISZ catalyst                    | 4       |
| Figure S5  | TEM image reduced ZnCr/ISZ catalyst                        | 5       |
| Figure S6  | TEM image reduced ZnCr/ISZ catalyst                        | 5       |
| Figure S7  | Elemental mapping of spent ZnCr/ISZ catalyst               | 6       |
| Figure S8  | FTIR spectra of fresh and spent ZnCr/ISZ catalyst          | 6       |
| Figure S9  | FT-IR of fresh and spent ZnCr/ISZ catalyst                 | 7       |
| Figure S10 | TPR profile of Zn/ISZ catalyst.                            | 7       |

|               |                                                                                                                                                                       |                |
|---------------|-----------------------------------------------------------------------------------------------------------------------------------------------------------------------|----------------|
| Figure S11    | XP spectra of C1s and O1s of fresh and spent ZnCr/ISZ catalyst                                                                                                        | 8              |
| Figure S12    | Thermogravimetric analysis (TGA) data of (a) fresh, (b) spent ZnCr/ISZ catalyst and (c) pure ISZ support. Note: spent catalyst was recovered after 4h time-on-stream. | 8              |
| Figure S13    | Survey scan of fresh and spent ZnCr/ISZ catalyst                                                                                                                      | 9              |
| Figure S14    | Recyclability of ZnCr/ISZ (imidazole supported zeolite) after several cycle.                                                                                          | 9              |
| Figure S15    | GC- DHA chromatogram of liquid product (as per ASTM D6730), indentation has been done using the relative RT.                                                          | 10             |
| <b>Tables</b> |                                                                                                                                                                       | <b>Page no</b> |
| Table S1      | Brønsted and Lewis acidic strength of different imidazole supported zeolite catalyst                                                                                  | 12             |
| Table S2      | XPS peak fitting data for Zn, Al, Cr and Si (Calculated by using Origin software)                                                                                     | 12-13          |
| Table S3      | Detail hydrocarbon analysis (GC-DHA) data of the liquid product, as per ASTM D6730                                                                                    | 14             |
| Table S4      | Compositions of the gaseous product as per ASTM D7833 (GC-RGA) over ZnCr/ISZ catalyst.                                                                                | 15             |
| Table S5      | Products distribution from aromatisation of waste cooking oil over a different loading of Zn and Co supported ISZ zeolite catalyst                                    | 16             |
| Table S6      | Table for aromatics distribution over time-on-stream                                                                                                                  | 17             |
| Table S7      | Recent Literature survey on waste cooking oil into valuable chemicals                                                                                                 | 18             |
| Table S8      | Py-probe data of <sup>12</sup> C Methyl oleate with catalyst                                                                                                          | 19-25          |
| Table S9      | Pyro-probe data of <sup>12</sup> C methyl linoleate with catalyst                                                                                                     | 26-28          |
| Table S10     | Pyro-probe data of <sup>12</sup> C methyl palmitate with catalyst                                                                                                     | 29             |
| References    |                                                                                                                                                                       | 30             |

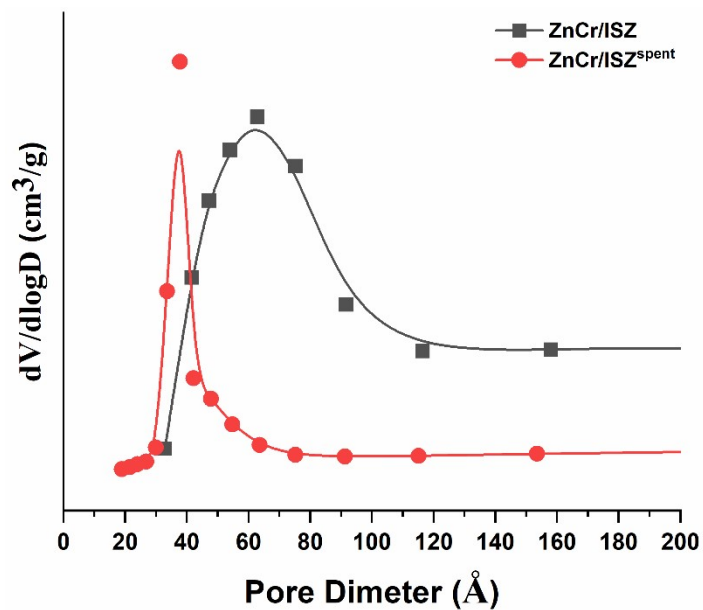

**Figure S1.** Pore diameter of fresh and spent ZnCr/ISZ catalyst.

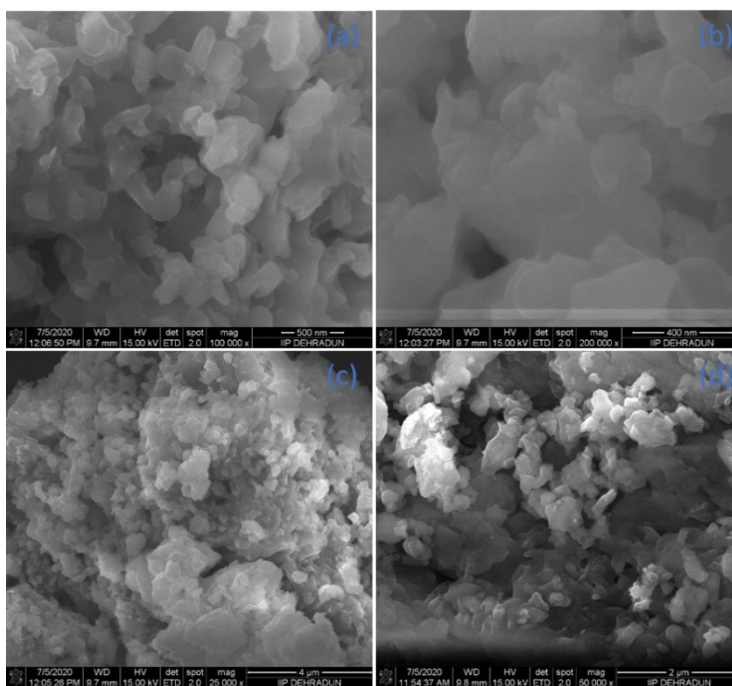

**Figure S2:** SEM images of (a,b)fresh and (c,d) spent ZnCr/ISZ catalyst

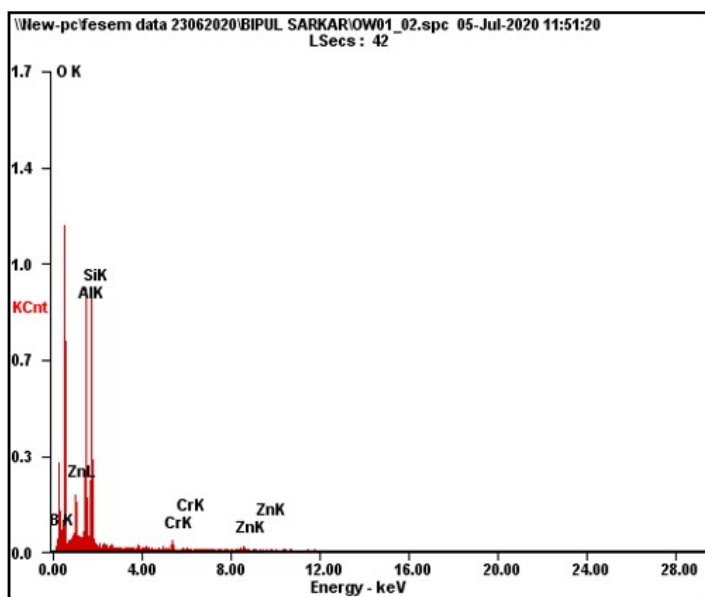

| Element | Wt %  | At %  |
|---------|-------|-------|
| Si K    | 40.36 | 35.89 |
| AlK     | 07.69 | 04.06 |
| ZnK     | 07.71 | 03.90 |
| CrK     | 00.87 | 00.24 |
| OK      | 01.05 | 00.23 |

Figure S3: EDX spectrum of ZnCr/ISZ catalyst

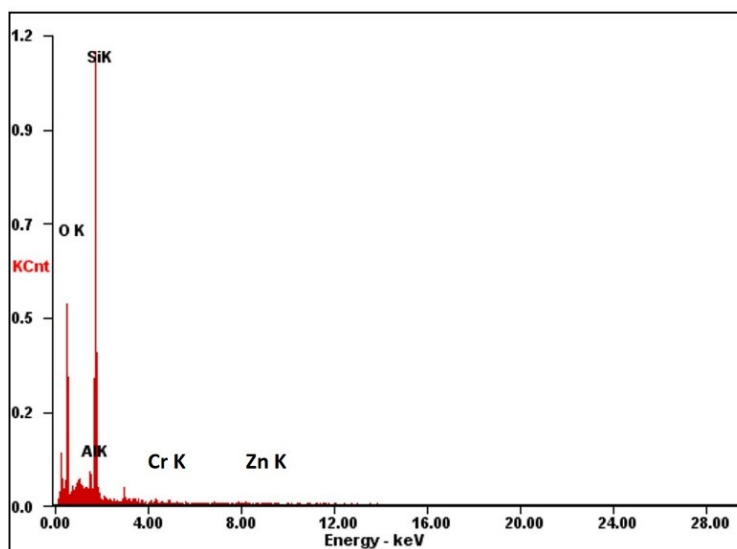

| Element | Wt %  | At %  |
|---------|-------|-------|
| Si K    | 40.36 | 34.17 |
| AlK     | 07.69 | 04.08 |
| ZnK     | 06.5  | 03.7  |
| CrK     | 00.75 | 00.23 |
| OK      | 01.00 | 00.21 |

Figure S4. EDX spectrum of spent ZnCr/ISZ catalyst

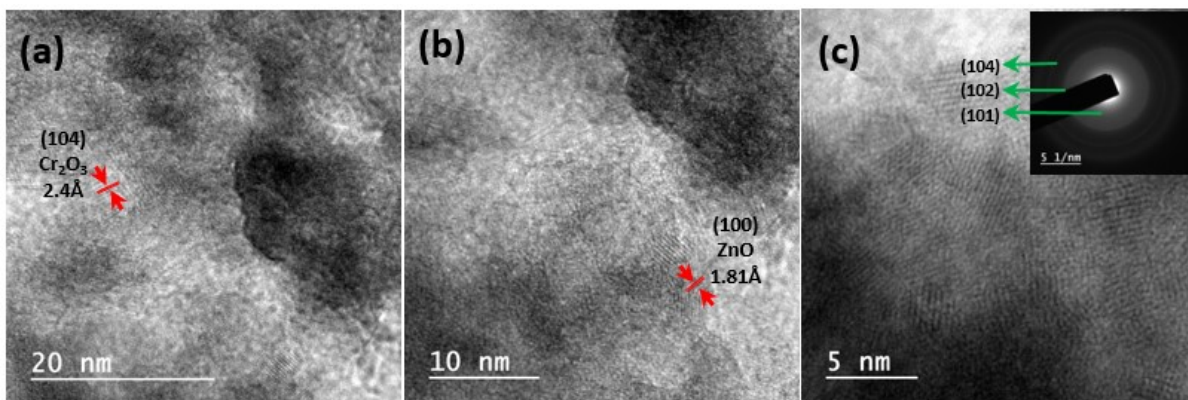

**Figure S5:** TEM image reduced ZnCr/ISZ catalyst

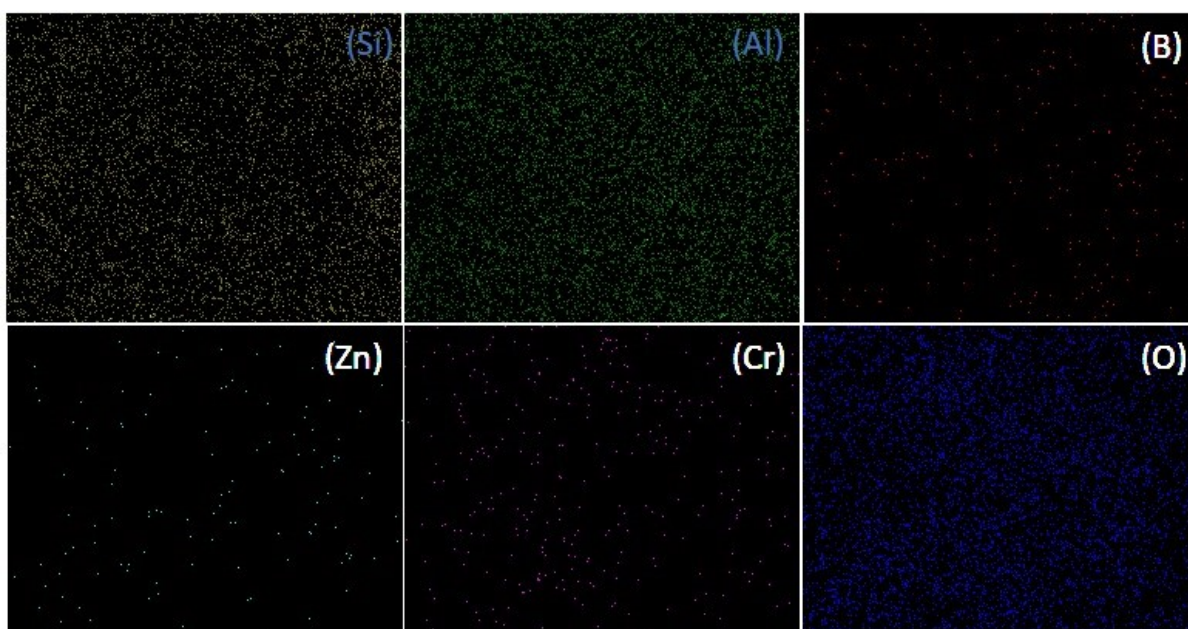

**Figure S6:** TEM image reduced ZnCr/ISZ catalyst

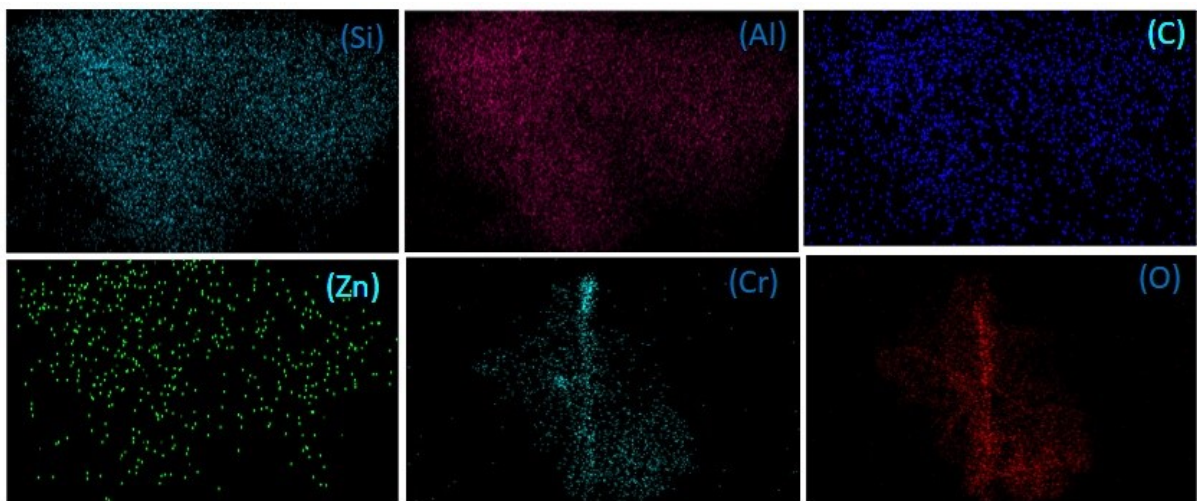

**Figure S7.** Elemental mapping of spent ZnCr/ISZ catalyst

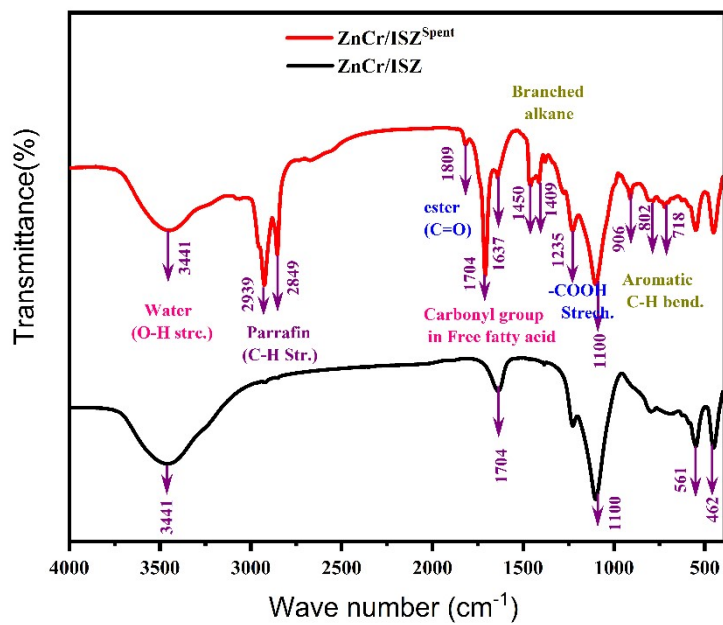

**Figure S8.** FTIR spectra of fresh and spent ZnCr/ISZ catalyst

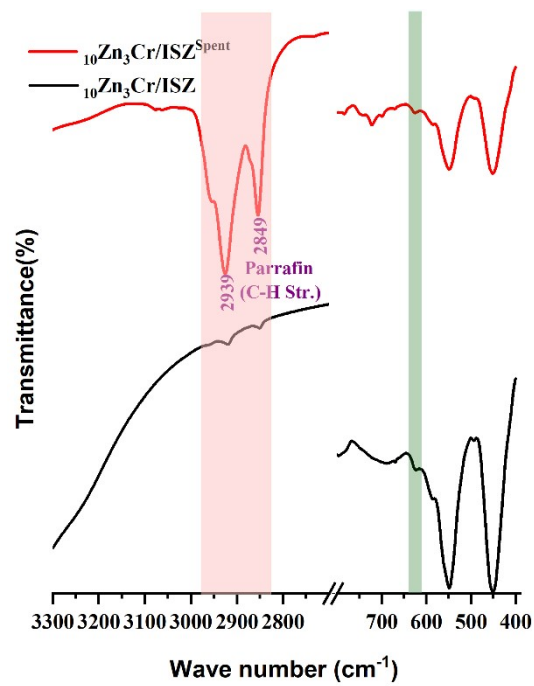

Figure S9. FT-IR of fresh and spent ZnCr/ISZ catalyst

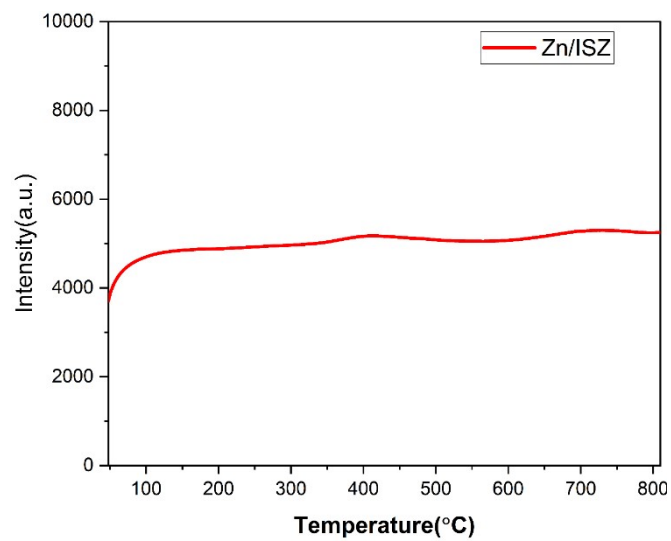

Figure S10. TPR profile of Zn/ISZ catalyst.

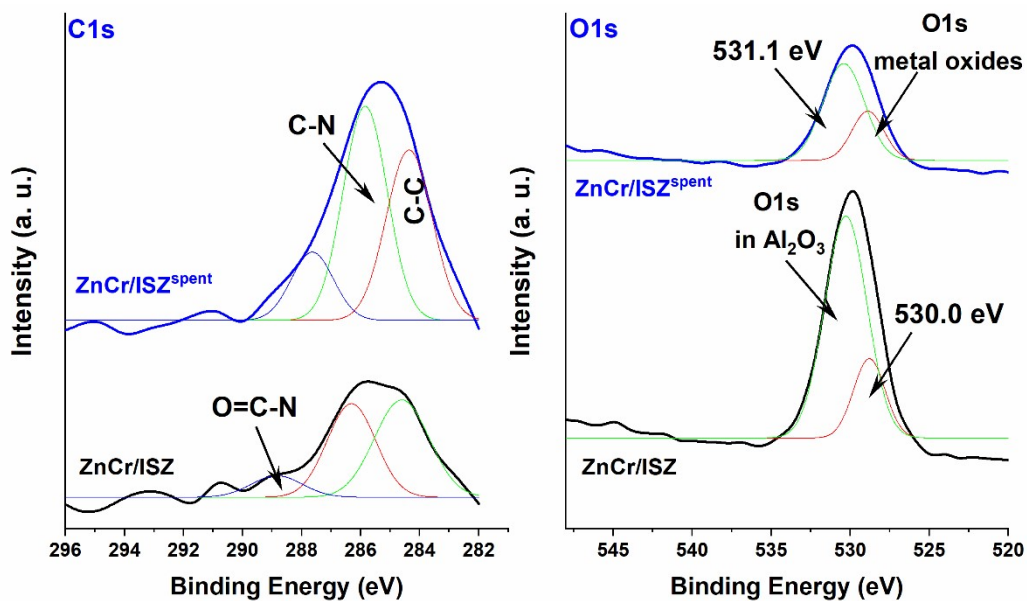

**Figure S11.** XP spectra of C1s and O1s of fresh and spent ZnCr/ISZ catalyst

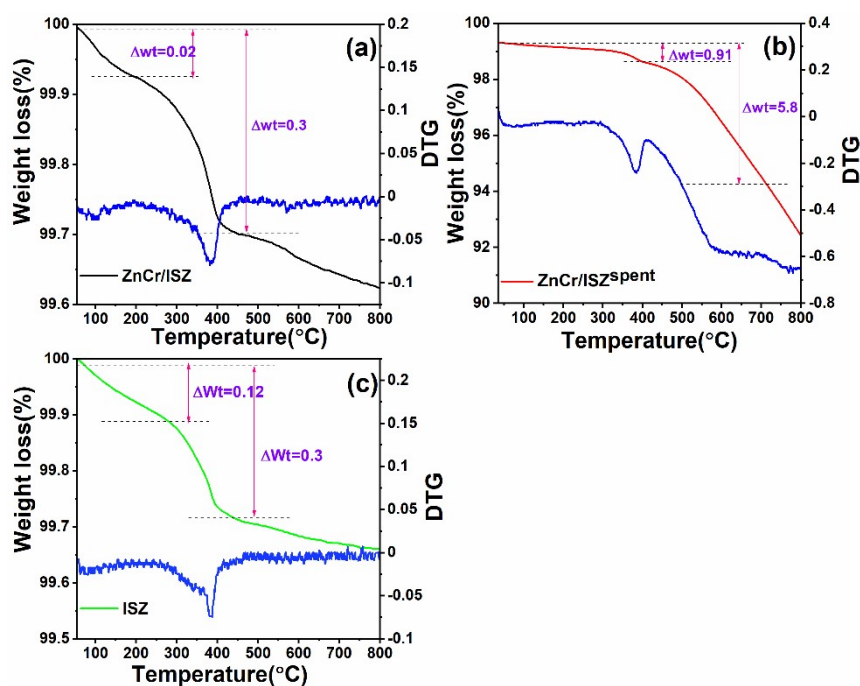

**Figure S12.** Thermogravimetric analysis (TGA) data of (a) fresh, (b) spent ZnCr/ISZ catalyst and (c) pure ISZ support. Note: spent catalyst was recovered after 4h time-on-stream.



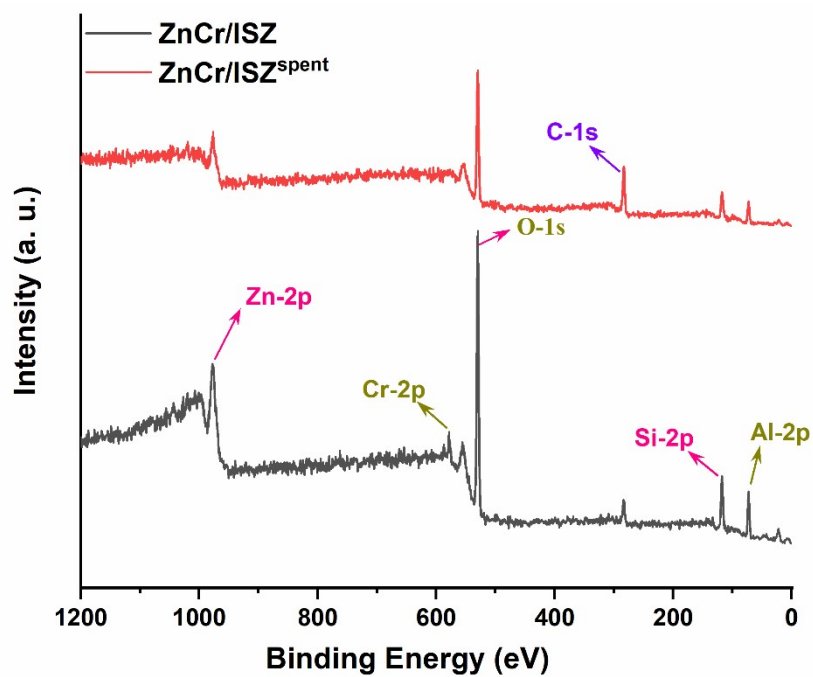

Figure S13. Survey scan of fresh and spent ZnCr/ISZ catalyst

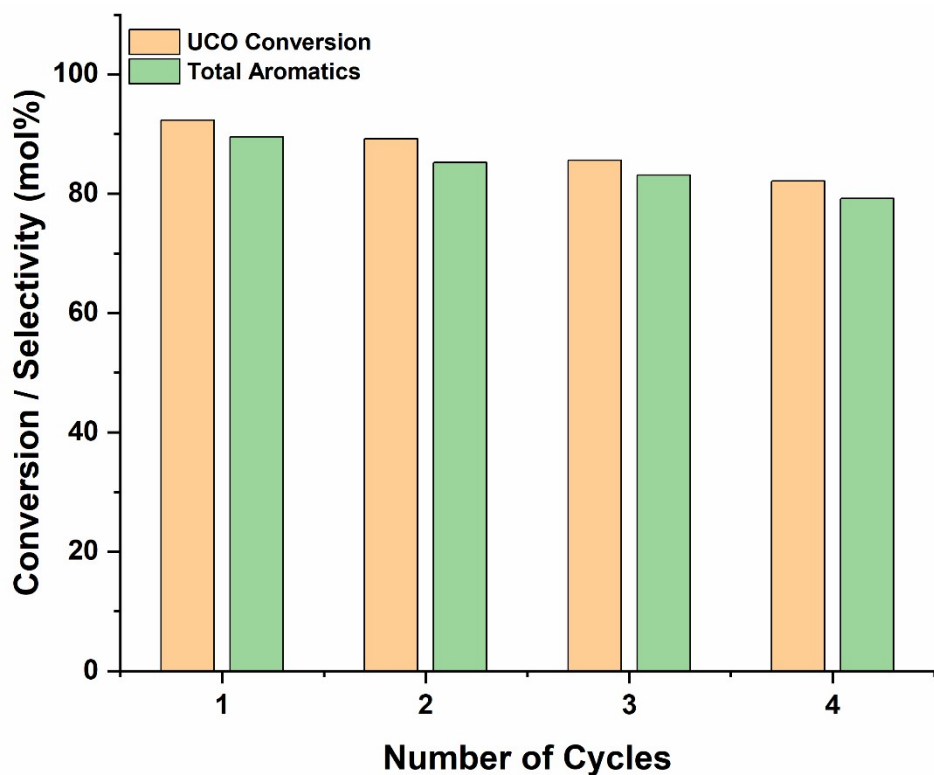

Figure S14. Recyclability of ZnCr/ISZ (imidazole supported zeolite) after several cycle.

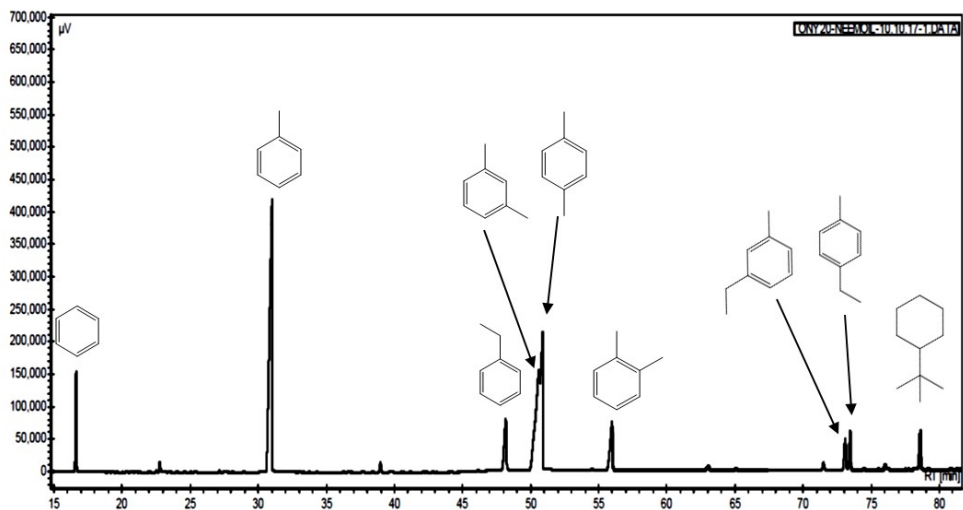

**Figure S15.** GC- DHA chromatogram of liquid product (as per ASTM D6730), indentation has been done using the relative RT.

### Mass balance

WCO Conversion = (weight of converted WCO)/ (weight of the WCO reactant) × 100%

Yield of liquid products = (C atoms in liquid products/C atoms in the starting reactant) × 100%

Weight of WCO reactant(g)=5.46

Weight of liquid product formed(g) =4.89

Total Liquid Yield= (4.89/5.4) \*100= 90.5%

Weight of gas product formed=0.1265

Total gases yield= (0.1265/5.46) \*100= 2.31%

Weight of solid (carbon deposit on catalyst) =0.0049

$$\text{Carbon Balance (in wt \%)} = \frac{\text{Wt. of liquid} + \text{Gas} + \text{Solid}}{\text{Wt of UCO}} \times 100\% = \frac{5.0214}{5.46} \times 100\% = 92 \pm 3\%$$

Carbon deposition rate= (Carbon deposition/ Catalyst amount\*Reaction time) = (0.0049/1\*4)  
=0.0012=1.20\*10<sup>-3</sup>

**Table S1:** Brønsted and Lewis acidic strength of different imidazole supported zeolite catalyst

| Catalyst               | Brønsted acidic strength (mmol/g) | Lewis acidic strength (mmol/g) <sup>b</sup> | B/L  | Total acidity (B+L) (mmol/g) |
|------------------------|-----------------------------------|---------------------------------------------|------|------------------------------|
| ISZ                    | 0.36                              | 0.12                                        | 3.0  | 0.48                         |
| 20Zn/Z                 | 0.28                              | 0.14                                        | 2.0  | 0.42                         |
| 20Zn3Cr/Z              | 0.26                              | 0.22                                        | 1.08 | 0.46                         |
| 20Zn3Cr2B/Z            | 0.25                              | 0.29                                        | 0.86 | 0.54                         |
| 20Zn3Cr2Al/Z           | 0.27                              | 0.23                                        | 1.17 | 0.50                         |
| 20Zn3Cr2S/Z            | 0.24                              | 0.28                                        | 0.85 | 0.52                         |
| 20Zn3Cr2P/Z            | 0.26                              | 0.25                                        | 1.04 | 0.51                         |
| 20Zn3Cr/Z <sup>a</sup> | 0.29                              | 0.14                                        | 2.07 | 0.43                         |

Brønsted and Lewis acidic site can be calculated using Py-Ir, <sup>a</sup> spent catalyst: recovered after 4 hr time on stream, <sup>b</sup> Standard deviation for acidity  $\pm 0.5$

**Table S2.** XPS peak fitting data for Zn, Al, Cr and Si (Calculated by using Origin software)**Zn-2p**

| Metal                 | Peak              | Peak Position | Peak Area         | % Fitting      |
|-----------------------|-------------------|---------------|-------------------|----------------|
| <b>Fresh Catalyst</b> |                   |               |                   |                |
| <b>Zn (fitted)</b>    | 2p3/2             | 1019.5945     | 2910.0049         | <b>96.63 %</b> |
|                       | 2p1/2             | 1042.5989     | 1455.51973        |                |
|                       | <b>Cumulative</b> | -             | <b>4365.52463</b> |                |
| <b>Zn Raw</b>         | 2p3/2             | 1019.57256    | 2946.71447        |                |
|                       | 2p1/2             | 1042.64566    | 1570.74468        |                |
|                       | <b>Cumulative</b> | -             | <b>4517.45915</b> |                |
| <b>Spent Catalyst</b> |                   |               |                   |                |
| <b>Zn (fitted)</b>    | 2p3/2             | 1019.28512    | 5397.22324        | <b>99.42%</b>  |
|                       | 2p1/2             | 1042.28386    | 2675.92126        |                |
|                       | <b>Cumulative</b> | -             | <b>8073.1445</b>  |                |
| <b>Zn Raw</b>         | 2p3/2             | 1019.27508    | 5510.90957        |                |
|                       | 2p1/2             | 1042.36089    | 2608.66946        |                |
|                       | <b>Cumulative</b> | -             | <b>8119.57903</b> |                |

**Al-2p**

| Metal | Peak | Peak Position | Peak Area | % Fitting |
|-------|------|---------------|-----------|-----------|
|-------|------|---------------|-----------|-----------|

| Fresh Catalyst |            |          |              |         |
|----------------|------------|----------|--------------|---------|
| Al (fitted)    | Peak 1     | 75.62312 | 15955.84004  | 97.16 % |
|                | Peak 2     | 74.48118 | 13242.16732  |         |
|                | Cumulative | -        | 29168.00736  |         |
| Al Raw         | Raw        | -        | 30,018.3463  |         |
| Spent Catalyst |            |          |              |         |
| Al (fitted)    | Peak 1     | 75.77273 | 13964.51059  | 99.09%  |
|                | Peak 2     | 74.55898 | 15584.44958  |         |
|                | Cumulative | -        | 29,548.96017 |         |
| Al Raw         | Raw data   | -        | 29,819.80916 |         |

### Cr-2p

| Metal          | Peak       | Peak Position | Peak Area  | % Fitting |
|----------------|------------|---------------|------------|-----------|
| Fresh Catalyst |            |               |            |           |
| Cr-2p          | Peak 1     | 575.80361     | 337.02512  | 99.07%    |
|                | Peak 2     | 585.50407     | 168.6196   |           |
|                | Peak 3     | 578.05476     | 265.42322  |           |
|                | Peak 4     | 587.74517     | 124.01506  |           |
|                | Peak 5     | 582.80445     | 174.34465  |           |
|                | Cumulative | -             | 1069.42765 |           |
| Cr-2p (Raw)    | Raw data   | -             | 1079.44794 |           |
| Spent Catalyst |            |               |            |           |
| Cr-2p          | Peak 1     | 575.8802      | 368.80394  | 99.61%    |
|                | Peak 2     | 585.58485     | 182.72314  |           |
|                | Peak 3     | 578.24806     | 232.09816  |           |
|                | Peak 4     | 587.94773     | 115.02482  |           |
|                | Peak 5     | 582.80635     | 173.65441  |           |
|                | Cumulative | -             | 1072.30447 |           |
| Cr-2p (Raw)    | Raw data   | -             | 1076.50028 |           |

### Si-2p

| Metal          | Peak       | Peak Position | Peak Area  | % Fitting |
|----------------|------------|---------------|------------|-----------|
| Fresh Catalyst |            |               |            |           |
| Si-2p          | Peak 1     | 101.85179     | 3223.13608 | 98.33%    |
|                | Peak 2     | 102.57831     | 1136.02628 |           |
|                | Cumulative | -             | 4359.16236 |           |
| Si-2p (Raw)    | Raw data   | -             | 4433.09267 |           |
| Spent Catalyst |            |               |            |           |
| Si-2p          | Peak 1     | 101.54266     | 1915.32251 | 95.42%    |
|                | Peak 2     | 102.41532     | 2318.04999 |           |
|                | Cumulative | -             | 4233.3725  |           |
| Si-2p (Raw)    | Raw data   | -             | 4436.23349 |           |

**Table S3.** Detail hydrocarbon analysis (GC-DHA) data of the liquid product, as per ASTM D6730

| <b>Carbon No</b> | <b>Saturates</b> |             | <b>Unsaturated</b> |               |                | <b>Aromatics</b> | <b>Oxyg unknown</b> | <b>Total</b> |
|------------------|------------------|-------------|--------------------|---------------|----------------|------------------|---------------------|--------------|
|                  | <b>Cyclic</b>    | <b>Iso</b>  | <b>Normal</b>      | <b>Cyclic</b> | <b>N + Iso</b> |                  |                     |              |
| <b>4</b>         |                  | 0.01        |                    |               | 0.10           |                  |                     | 0.11         |
| <b>5</b>         |                  | 0.13        | 0.07               | 0.02          | 0.25           |                  |                     | 0.47         |
| <b>6</b>         |                  | 0.28        | 0.18               | 0.21          | 0.09           | 15.3             |                     | 16.06        |
| <b>7</b>         | 0.02             | 0.05        | 0.48               |               | 0.25           | 35.6             |                     | 36.4         |
| <b>8</b>         |                  | 0.04        | 0.57               |               |                | 29.1             |                     | 29.71        |
| <b>9</b>         | 0.5              | 0.7         |                    |               |                | 4.3              |                     | 5.5          |
| <b>10</b>        | 1.3              | 0.12        | 0.09               |               |                | 3.0              |                     | 4.51         |
| <b>11</b>        |                  | 0.47        | 0.09               |               |                | 1.2              | 0.36                | 2.21         |
| <b>12</b>        | 0.03             | 0.08        | 0.4                |               |                | 1.0              | 0.59                | 2.1          |
| <b>13</b>        |                  |             | 0.11               |               |                |                  | 0.69                | 0.80         |
| <b>14</b>        |                  |             | 0.50               |               |                |                  | 0.50                | 1.0          |
| <b>15</b>        |                  |             | 0.08               |               |                |                  | 0.70                | 0.78         |
| <b>16</b>        |                  |             |                    |               |                |                  | 0.35                | 0.35         |
| <b>17</b>        |                  |             |                    |               |                |                  |                     |              |
| <b>18+</b>       |                  |             |                    |               |                |                  |                     |              |
| <b>Total</b>     | <b>1.85</b>      | <b>1.88</b> | <b>2.66</b>        | <b>0.23</b>   | <b>0.69</b>    | <b>89.5</b>      | <b>3.19</b>         | <b>100</b>   |

**Table S4.** Compositions of the gaseous product as per ASTM D7833 (GC-RGA) over ZnCr/ISZ catalyst.

| <b>Sr. No.</b> | <b>Product name</b> | <b>Carbon No.</b> | <b>Product (in %)</b> | <b>Total product formed (in mg)</b> |
|----------------|---------------------|-------------------|-----------------------|-------------------------------------|
| <b>1</b>       | Hydrogen            | H <sub>2</sub>    | 8.9                   | 0.0018                              |
| <b>2</b>       | Carbon dioxide      | C <sub>1</sub>    | 3.1                   | 0.0092                              |
| <b>3</b>       | Carbon monoxide     | C <sub>1</sub>    | 2.6                   | 0.014                               |
| <b>4</b>       | Methane             | C <sub>1</sub>    | 4.7                   | 0.023                               |
| <b>5</b>       | Ethane              | C <sub>2</sub>    | 1.18                  | 0.0061                              |
| <b>6</b>       | Ethylene            | C <sub>2</sub>    | 11.57                 | 0.0307                              |
| <b>7</b>       | Propylene           | C <sub>3</sub>    | 22.96                 | 0.0256                              |
| <b>8</b>       | Iso Butane          | C <sub>4</sub>    | 2.38                  | 0.0532                              |
| <b>9</b>       | n butane            | C <sub>4</sub>    | 2.04                  | 0.0012                              |
| <b>10</b>      | Iso-Butene          | C <sub>4</sub>    | 0.75                  | 0.0056                              |
| <b>11</b>      | 2-Pentene           | C <sub>5</sub>    | 1.82                  | 0.0023                              |
| <b>12</b>      | 2-Methyl-2-Butene   | C <sub>5</sub>    | 1.39                  | 0.0009                              |

**Table S5.** Products distribution from aromatisation of waste cooking oil over a different loading of Zn and Co supported ISZ zeolite catalyst

| S/N | Catalyst                              | Total Conversion (%) | Total aromatics (%) | Total (C6-C8) (%) | Product selectivity |          |           |           |           |              |                |
|-----|---------------------------------------|----------------------|---------------------|-------------------|---------------------|----------|-----------|-----------|-----------|--------------|----------------|
|     |                                       |                      |                     |                   | Benzen e            | Toluen e | o-xylen e | m-xylen e | p-xylen e | total xylene | Ethyl-benzen e |
| 1   | Zn <sub>5</sub> /ISZ                  | 82.3                 | 85.3                | 51.7              | 7.1                 | 26.2     | 2.5       | 7.0       | 7.1       | 16.6         | 1.8            |
| 2   | Zn <sub>10</sub> /ISZ                 | 85.1                 | 84.0                | 57                | 8.2                 | 28.4     | 3.2       | 7.6       | 7.6       | 18.4         | 2.0            |
| 3   | Zn <sub>20</sub> /ISZ                 | 89.0                 | 91.0                | 62.6              | 9.0                 | 30.7     | 3.8       | 8.2       | 8.5       | 20.5         | 2.4            |
| 4   | Zn <sub>20</sub> Cr <sub>1</sub> /ISZ | 89.6                 | 84.6                | 58.7              | 10.3                | 28.9     | 2.4       | 7.5       | 8.0       | 17.9         | 1.6            |
| 5   | Zn <sub>20</sub> Cr <sub>2</sub> /ISZ | 90.3                 | 87.3                | 61.6              | 10.9                | 30.1     | 2.8       | 7.9       | 7.9       | 18.6         | 2.0            |
| 6   | Zn <sub>20</sub> Cr <sub>3</sub> /ISZ | 92.3                 | 89.5                | 65.9              | 12.0                | 32.3     | 3.2       | 9.5       | 7.1       | 19.8         | 1.8            |

Reaction conditions: catalyst wt-1 g (pelletized); reaction temp.-430°C; LHSV-1.5 h-1; GHSV-1200 h-1; time-after 4h. \* relative standard deviation (RSD) is ±5%



**Table S6.** Table for aromatics distribution over time-on-stream

| Time | Aromatics (Total) | Mono aromatics | Mono (Branched) | Di- aromatics | Poly- aromatics | Benzene | Toluene | Xylenes |     |     | Ethyl benzene |
|------|-------------------|----------------|-----------------|---------------|-----------------|---------|---------|---------|-----|-----|---------------|
|      |                   |                |                 |               |                 |         |         | o       | m   | p   |               |
| 4    | 89.5              | 65.9           | 9.2             | 8.3           | 6.1             | 12      | 32.3    | 3.2     | 9.5 | 7.1 | 1.8           |
| 8    | 87.2              | 55             | 10.3            | 12.2          | 9.7             | 7.2     | 25.3    | 3.2     | 9.2 | 8   | 2.1           |
| 12   | 81.5              | 45.8           | 12.0            | 13.5          | 10.2            | 5.1     | 22.3    | 3       | 7.4 | 6.2 | 1.8           |
| 16   | 74.2              | 39.8           | 6.5             | 15.1          | 12.8            | 4.8     | 19.2    | 3       | 6.2 | 5.1 | 1.5           |
| 20   | 71.2              | 37.6           | 3.6             | 15.9          | 14.1            | 4.2     | 18.5    | 2.8     | 5.8 | 4.8 | 1.5           |

**Table S7.** Recent Literature survey on waste cooking oil into valuable chemicals

| Feed                         | Catalysts                          | Temperature (°C) | Reactor and reaction condition                                  | Aromatic selectivity/ yield (%) | Stability | Ref      |
|------------------------------|------------------------------------|------------------|-----------------------------------------------------------------|---------------------------------|-----------|----------|
| Nonedible Oils               | Zn/HZSM-5                          | 515°C            | Catalytic fixed bed                                             | 58.56%                          | 3-4 hour  | 1, 2     |
| Waste cooking oil            | HZSM-5 with (CoO, NiO, CaO)        | 350-550°C        | Microwave-assisted catalytic pyrolysis                          | 702.20 mg/ml                    | -         | 3, 4     |
| Waste cooking oil            | HZSM-5                             | 450°C            | Microwave pyrolysis                                             | -                               | 60 min    | 4, 5     |
| Lignin and waste cooking oil | ZSM-5                              | 500 °C           | pyro probe reactor                                              | 82.6%                           | 30-60 min | 6, 7     |
| Non-edible oil cake's        | Al/SBA-15                          | 400 °C,          | Hydrothermal reactor at high pressure -25 bar (H <sub>2</sub> ) | 19.5%                           | -         | 8, 9     |
| Rubber seed oil              | ZSM-5                              | 550 °C           | Fixed bed reactor                                               | 78.6%                           | 15 min    | 10       |
| Camelina (sativa) seed oil   | Zn, Na/ZSM-5                       | 500°C            | Fixed bed reactor                                               | 6.2 %                           | 60 min    | 11       |
| Used cooking oil (UCO)       | Zn,Cr supported Imidazole catalyst | 400-550°C        | fixed bed continuous flow reactor                               | 89.5%                           | 4 h       | Our work |

We have compared the catalyst performance with the other catalyst reported in the literature. All the literature reports microwave-assisted pyrolysis of WCO or used WCO along with bio-oil, lignin, plastic etc., for microwave/catalytic fast co-pyrolysis. As an industrial intervention, microwave-assisted pyrolysis of WCO faces challenges related to heating uniformity, energy efficiency, and capital costs and thus requires further research. The use of co-pyrolysis is complex and in a very nascent research stage; therefore needs more time to mature. Thus, the direct conversion of WCO to aromatics is advantageous; in terms of C<sub>6</sub>-C<sub>8</sub> selectivity, it shows the best transformation ever reported from WCO.

**Table S8.** Py-probe data of <sup>12</sup>C Methyl oleate with catalyst

| Ret. time | Area (%) | Compound                                                                |
|-----------|----------|-------------------------------------------------------------------------|
| 1.905     | 0.06     | CH <sub>3</sub> C(O)O(CH <sub>2</sub> ) <sub>3</sub> CH=CH <sub>2</sub> |
| 2.179     | 0.12     | Formic acid, hexyl ester                                                |
| 2.262     | 0.21     | 2-Hexene                                                                |
| 2.337     | 0.18     | 2-Propenoic acid, methyl ester                                          |
| 2.55      | 0.16     | 1,3-Cyclohexadiene                                                      |
| 2.644     | 0.08     | Cyclopentene, 3-methyl-                                                 |
| 2.747     | 0.28     | Benzene                                                                 |
| 3.03      | 0.24     | Cyclopentane, 1,2-dimethyl-                                             |
| 3.13      | 0.48     | Heptane                                                                 |
| 3.319     | 0.08     | Methyl 3-butenolate                                                     |
| 3.434     | 0.06     | Methyl 11-(2-cyclopenten-1-yl)undecanoate                               |
| 3.709     | 0.24     | 3-Methylenecyclohexene                                                  |
| 3.794     | 0.04     | Bicyclo[4.1.0]hept-2-ene                                                |
| 3.909     | 0.13     | Cyclopentane, ethylidene-                                               |
| 4.109     | 1.03     | Toluene                                                                 |
| 4.21      | 0.03     | Cyclopentane, 1,3-bis(methylene)-                                       |
| 4.462     | 0.2      | Cyclopropane, pentyl-                                                   |
| 4.63      | 0.83     | Hexanal                                                                 |
| 4.683     | 0.03     | 1,3,5-Cycloheptatriene                                                  |
| 4.754     | 0.06     | 4-Pentenoic acid, methyl ester                                          |
| 4.847     | 0.04     | Silicone caulk                                                          |
| 5.007     | 0.06     | Methyl valerate                                                         |
| 5.04      | 0.05     | 1,3-Octadiene                                                           |
| 5.347     | 0.06     | 1,3-Cyclohexadiene, 5,6-dimethyl-                                       |
| 5.403     | 0.06     | 1-Propylcyclopentene                                                    |
| 5.518     | 0.04     | 1-Ethyl-2-trifluoroacetoxycyclohexane                                   |
| 5.678     | 0.41     | Ethylbenzene                                                            |
| 5.892     | 0.93     | p-Xylene                                                                |
| 6.155     | 0.12     | 2-Heptanone                                                             |
| 6.21      | 0.25     | Cyclopropane, 1-methyl-2-pentyl-                                        |
| 6.256     | 0.13     | Cyclohexanone                                                           |
| 6.313     | 0.08     | 3-Nonene, (E)-                                                          |

|       |      |                                                                 |
|-------|------|-----------------------------------------------------------------|
| 6.384 | 0.29 | Heptanal                                                        |
| 6.424 | 0.07 | 2-Cyclopenten-1-one, 2-methyl-                                  |
| 6.453 | 0.07 | 2-Nonene, (E)-                                                  |
| 6.539 | 0.13 | 5-Hexenoic acid, methyl ester                                   |
| 6.764 | 0.2  | Hexanoic acid, methyl ester                                     |
| 6.805 | 0.07 | 1,3-Nonadiene, (E)-                                             |
| 6.91  | 0.03 | 2-Cyclohexen-1-one                                              |
| 7.191 | 0.05 | Cyclopentene, 1-butyl-                                          |
| 7.315 | 0.16 | Benzene, propyl-                                                |
| 7.354 | 0.05 | 2-Heptenal, (Z)-                                                |
| 7.451 | 0.07 | 3-Oxatricyclo[3.2.2.0(2,4)]nonane                               |
| 7.511 | 0.32 | Benzene, 1-ethyl-4-methyl-                                      |
| 7.697 | 0.03 | 1-Octen-3-one                                                   |
| 7.771 | 0.06 | 1,1,3,3,5,5,7,7-Octamethyl-7-(2-methylpropoxy)tetrasiloxan-1-ol |
| 7.803 | 0.06 | Phenol                                                          |
| 7.961 | 0.18 | 1-Decene                                                        |
| 8.037 | 0.22 | Mesitylene                                                      |
| 8.162 | 0.22 | Octanal                                                         |
| 8.349 | 0.37 | 6-Heptenoic acid, methyl ester                                  |
| 8.51  | 0.38 | Heptanoic acid, methyl ester                                    |
| 8.549 | 0.03 | 5-Decyne                                                        |
| 8.674 | 0.03 | (E)-4-Oxohex-2-enal                                             |
| 8.749 | 0.15 | Indane                                                          |
| 8.907 | 0.09 | 1H-Indene, 1-chloro-2,3-dihydro-                                |
| 8.992 | 0.03 | Benzoic acid, cyclohexylmethyl ester                            |
| 9.084 | 0.43 | Cyclohexane, 1,3-butadienylidene-                               |
| 9.22  | 0.03 | Ethyl (Z)-non-3-enyl carbonate                                  |
| 9.398 | 0.06 | 3-Cyclopentylpropionic acid, 2-methylphenyl ester               |
| 9.518 | 0.03 | Acetic acid, 2,4,4-trimethylpentyl ester                        |
| 9.555 | 0.03 | Bicyclo[2.2.2]octane, 2-methyl-                                 |
| 9.634 | 0.16 | E-11,13-Tetradecadien-1-ol                                      |
| 9.676 | 0.06 | 4-Nonenal, (E)-                                                 |
| 9.719 | 0.16 | 5-Undecene, (E)-                                                |
| 9.858 | 0.29 | Nonanal                                                         |
| 9.983 | 0.22 | 3-Octenoic acid, methyl ester, (Z)-                             |

|        |      |                                                     |
|--------|------|-----------------------------------------------------|
| 10.178 | 0.92 | Octanoic acid, methyl ester                         |
| 10.209 | 0.13 | Cycloundecene(E)                                    |
| 10.285 | 0.04 | 7-Tetradecen-1-ol, (Z)-, TMS derivative             |
| 10.377 | 0.04 | 2,5-Dimethylphenyl methyl carbinol                  |
| 10.479 | 0.03 | 1H-Indene, 2,3-dihydro-5-methyl-                    |
| 10.518 | 0.05 | 5-Undecene, 3-methyl-, (E)-                         |
| 10.552 | 0.03 | p-Toluic acid, 2,6-dimethylnon-1-en-3-yn-5-yl ester |
| 10.649 | 0.07 | 1H-Indene, 3-methyl-                                |
| 10.734 | 0.31 | 2-Decyn-1-ol                                        |
| 10.825 | 0.04 | Cyclooctylidene-(2-phenylaziridin-1-yl)amine        |
| 11.096 | 0.03 | (3E,5Z)-1,3,5-Undecatriene                          |
| 11.201 | 0.24 | 1-Dodecene                                          |
| 11.274 | 0.06 | 4-Undecene, (E)-                                    |
| 11.415 | 0.1  | Decanal                                             |
| 11.529 | 0.19 | 8-Nonenoic acid, methyl ester                       |
| 11.659 | 0.18 | Nonanoic acid, methyl ester                         |
| 11.715 | 0.25 | 4-Dodecen-1-ol                                      |
| 11.875 | 0.06 | 2-Ethyl-2,3-dihydro-1H-indene                       |
| 11.984 | 0.05 | 4-Oxononanal                                        |
| 12.036 | 0.03 | 11-Tridecyn-1-ol                                    |
| 12.088 | 0.04 | 5,7-Dodecadiene, (E,E)-                             |
| 12.27  | 0.4  | 2-Decenal, (E)-                                     |
| 12.324 | 0.09 | 13,16-Octadecadiynoic acid, methyl ester            |
| 12.375 | 0.13 | 6-Nonynoic acid, methyl ester                       |
| 12.753 | 0.16 | Formic acid, 10-chlorodecyl ester                   |
| 12.851 | 0.1  | Naphthalene, 1-methyl-                              |
| 13.1   | 0.15 | 10-Hydroxydecanoic acid, methyl ester               |
| 13.178 | 0.25 | Decanoic acid, methyl ester                         |
| 13.256 | 0.05 | Methyl 8-oxooctanoate                               |
| 13.69  | 0.14 | 2-Undecenal                                         |
| 13.74  | 0.11 | 2-Undecenal                                         |
| 13.855 | 0.15 | 2-Undecenal                                         |
| 14.545 | 0.29 | Nonanoic acid, 9-oxo-, methyl ester                 |
| 14.57  | 0.23 | Nonanoic acid, 9-oxo-, methyl ester                 |
| 14.652 | 0.7  | Nonanoic acid, 9-oxo-, methyl ester                 |

|        |      |                                                                                                                         |
|--------|------|-------------------------------------------------------------------------------------------------------------------------|
| 14.748 | 0.58 | Cyclopropanebutanoic acid, 2-[[2-[[2-[(2-pentylcyclopropyl)methyl]cyclopropyl]methyl]cyclopropyl]methyl]-, methyl ester |
| 15.715 | 0.99 | Dodecanoic acid, methyl ester                                                                                           |
| 15.74  | 0.38 | Dodecanoic acid, methyl ester                                                                                           |
| 15.796 | 0.54 | Dodecanoic acid, methyl ester                                                                                           |
| 15.829 | 1.42 | Dodecanoic acid, methyl ester                                                                                           |
| 16.42  | 0.08 | 7-Hexadecenoic acid, methyl ester, (Z)-                                                                                 |
| 16.517 | 0.28 | 9-Hexadecenoic acid, methyl ester, (Z)-                                                                                 |
| 16.655 | 0.03 | 7-Hexadecenoic acid, methyl ester, (Z)-                                                                                 |
| 16.854 | 0.04 | Tridecanoic acid, methyl ester                                                                                          |
| 16.9   | 0.03 | 12-Tridecynoic acid, methyl ester                                                                                       |
| 17.005 | 0.04 | Dodecanoic acid, 10-methyl-, methyl ester                                                                               |
| 17.595 | 0.23 | Tridecanoic acid, 12-methyl-, methyl ester                                                                              |
| 17.715 | 0.42 | Methyl 12-oxo-9-dodecenoate                                                                                             |
| 17.745 | 0.1  | 9-Octadecenoic acid (Z)-, methyl ester                                                                                  |
| 17.891 | 0.98 | Methyl myristoleate                                                                                                     |
| 18.133 | 3.35 | Methyl tetradecanoate                                                                                                   |
| 18.173 | 0.72 | Methyl tetradecanoate                                                                                                   |
| 18.225 | 0.9  | Tridecanoic acid, 12-methyl-, methyl ester                                                                              |
| 18.246 | 0.54 | Methyl tetradecanoate                                                                                                   |
| 18.3   | 2.27 | Methyl tetradecanoate                                                                                                   |
| 18.587 | 0.12 | Tridecanoic acid, 4,8,12-trimethyl-, methyl ester                                                                       |
| 18.62  | 0.06 | Tridecanoic acid, 4,8,12-trimethyl-, methyl ester                                                                       |
| 18.835 | 1.51 | Pentadecanoic acid, methyl ester                                                                                        |
| 18.865 | 0.27 | Tridecanoic acid, 12-methyl-, methyl ester                                                                              |
| 18.9   | 0.38 | Pentadecanoic acid, methyl ester                                                                                        |
| 18.921 | 0.27 | Tetradecanoic acid, 12-methyl-, methyl ester                                                                            |
| 18.945 | 1.19 | Tridecanoic acid, 12-methyl-, methyl ester                                                                              |
| 19.092 | 2.18 | Pentadecanoic acid, methyl ester                                                                                        |
| 19.325 | 0.89 | Pentadecanoic acid, methyl ester                                                                                        |
| 19.986 | 2.62 | 9-Hexadecenoic acid, methyl ester, (Z)-                                                                                 |
| 20.295 | 5.8  | Hexadecanoic acid, methyl ester                                                                                         |
| 20.357 | 1.52 | Hexadecanoic acid, methyl ester                                                                                         |
| 20.414 | 0.6  | Tridecanoic acid, methyl ester                                                                                          |

|        |      |                                                       |
|--------|------|-------------------------------------------------------|
| 20.435 | 3.28 | Z-11-Tetradecen-1-ol difluoroacetate                  |
| 20.625 | 1.59 | Hexadecanoic acid, methyl ester                       |
| 20.793 | 0.2  | Hexadecanoic acid, 14-methyl-, methyl ester           |
| 20.955 | 0.89 | Cyclopropaneoctanoic acid, 2-hexyl-, methyl ester     |
| 21.026 | 0.68 | Cyclopropaneoctanoic acid, 2-hexyl-, methyl ester     |
| 21.063 | 0.27 | Pentacosanoic acid, methyl ester                      |
| 21.1   | 0.36 | 11-Hexadecenoic acid, 15-methyl-, methyl ester        |
| 21.159 | 0.63 | 10-Undecenoic acid, methyl ester                      |
| 21.195 | 0.22 | Methyl 18-methylcosanoate                             |
| 21.242 | 0.44 | cis-10-Heptadecenoic acid, methyl ester               |
| 21.27  | 0.26 | cis-10-Heptadecenoic acid                             |
| 21.314 | 0.53 | 1,19-Eicosadiene                                      |
| 21.366 | 0.31 | Hexadecanoic acid, 14-methyl-, methyl ester           |
| 21.405 | 1.35 | Hexadecanoic acid, 14-methyl-, methyl ester           |
| 22.245 | 6.37 | 9-Octadecenoic acid, methyl ester, (E)-               |
| 22.34  | 1.77 | 9-Octadecenoic acid (Z)-, methyl ester                |
| 22.491 | 2.97 | 9-Octadecenoic acid, methyl ester, (E)-               |
| 22.57  | 1.8  | 9-Octadecenoic acid, methyl ester, (E)-               |
| 22.797 | 5.47 | 9-Octadecenoic acid, methyl ester, (E)-               |
| 22.851 | 1.39 | 9-Octadecenoic acid, methyl ester, (E)-               |
| 22.884 | 1.01 | 6-Octadecenoic acid, methyl ester, (Z)-               |
| 22.91  | 0.75 | 9-Octadecenoic acid, methyl ester, (E)-               |
| 22.95  | 1.23 | 9-Octadecenoic acid, methyl ester, (E)-               |
| 23.047 | 4.17 | 9-Octadecenoic acid, methyl ester, (E)-               |
| 23.124 | 0.33 | Methyl 9-cis,11-trans-octadecadienoate                |
| 23.17  | 0.61 | 1-Tetradecanol                                        |
| 23.208 | 1.18 | 1-Tetradecanol                                        |
| 23.293 | 0.44 | Methyl 9-cis,11-trans-octadecadienoate                |
| 23.348 | 0.52 | Methyl hexadec-9-enoate                               |
| 23.426 | 0.03 | Nonadecanoic acid, methyl ester                       |
| 23.529 | 0.06 | 8,11,14-Eicosatrienoic acid, (Z,Z,Z)-                 |
| 23.636 | 0.17 | 9-Octadecynoic acid, methyl ester                     |
| 23.685 | 0.09 | Butanoic acid, 4-(2-hydroxycyclohexyl)-, methyl ester |
| 23.846 | 1.26 | Oxiraneoctanoic acid, 3-octyl-, methyl ester, cis-    |
| 23.994 | 1.56 | Cyclopropaneoctanoic acid, 2-hexyl-, methyl ester     |

|        |      |                                                                                               |
|--------|------|-----------------------------------------------------------------------------------------------|
| 24.053 | 0.44 | Methyl 7-oxopentadecanoate                                                                    |
| 24.133 | 0.38 | Methyl 18-methylnonadecanoate                                                                 |
| 24.245 | 0.03 | 1,2-Cyclohexanedicarboxylic acid, heptyl 4-methoxyphenyl ester                                |
| 24.369 | 0.76 | Cyclohexane, [6-cyclopentyl-3-(3-cyclopentylpropyl)hexyl]-                                    |
| 24.439 | 0.06 | Pentanoic acid, 2-methyl-, anhydride                                                          |
| 24.522 | 0.14 | (1R,2R,3S,5R)-(-)-2,3-Pinandediol                                                             |
| 24.605 | 0.04 | 9-Octadecenoic acid, methyl ester, (E)-                                                       |
| 24.687 | 0.05 | Octadecanoic acid, 9,10-dihydroxy-, methyl ester                                              |
| 24.871 | 0.14 | Heptadeca-7,10-dione                                                                          |
| 24.988 | 0.3  | Cedrol                                                                                        |
| 25.095 | 0.04 | 1-Ethyltricyclo[5.2.1.1(2,6)]undec-8-en-11-ol                                                 |
| 25.434 | 1.58 | Cyclopropaneoctanoic acid, 2-octyl-, methyl ester                                             |
| 25.547 | 0.1  | Docosanoic acid, methyl ester                                                                 |
| 25.735 | 0.03 | trans-9-Octadecenoic acid, pentyl ester                                                       |
| 25.774 | 0.03 | 11-Dodecen-1-ol difluoroacetate                                                               |
| 26.032 | 0.03 | Butyl 9,12-octadecadienoate                                                                   |
| 26.112 | 0.09 | cis-11-Eicosenoic acid, methyl ester                                                          |
| 26.279 | 0.03 | Tricosanoic acid, methyl ester                                                                |
| 26.46  | 0.04 | Decyl oleate                                                                                  |
| 26.517 | 0.05 | Methyl 18-methylcosanoate                                                                     |
| 26.595 | 0.08 | Benzene, 1-iodo-3-(trifluoromethyl)-                                                          |
| 26.628 | 0.08 | Oxalic acid, 2-ethylhexyl octadecyl ester                                                     |
| 26.719 | 0.08 | Oleic diethanolamide                                                                          |
| 26.781 | 0.07 | (4aS,5S,8aS)-5-Isopentyl-1,1,4a-trimethyl-6-methylenedecahydronaphthalene                     |
| 26.804 | 0.08 | Triacontane                                                                                   |
| 26.861 | 0.19 | 15-Tetracosenoic acid, methyl ester, (Z)-                                                     |
| 27.023 | 0.03 | Tetracosanoic acid, methyl ester                                                              |
| 27.174 | 0.03 | 9-Octadecenoic acid (Z)-, hexadecyl ester                                                     |
| 27.205 | 0.03 | Methyl 18-methylcosanoate                                                                     |
| 27.275 | 0.03 | 2H-3,9a-Ethanocyclopent[b]oxocin-2-one, octahydro-5,5,7,11-tetramethyl-, (3S,6aS,7R,9aS,11R)- |
| 27.3   | 0.04 | Hexadecanoic acid, decyl ester                                                                |
| 27.418 | 0.06 | 9-Octadecenamide, (Z)-                                                                        |
| 27.643 | 0.11 | Squalene                                                                                      |



|        |      |                                           |
|--------|------|-------------------------------------------|
| 28.103 | 0.03 | Lubricant (grease)                        |
| 28.216 | 0.11 | Hexacosane, 1-iodo-                       |
| 28.541 | 0.11 | 9-Octadecenoic acid (Z)-, octadecyl ester |
| 28.598 | 0.04 | Tetracontane-1,40-diol                    |
| 28.628 | 0.04 | 13-Docosen-1-ol, (Z)-                     |
| 28.741 | 0.05 | Oleic anhydride                           |
| 28.875 | 0.04 | Triacontane, 1-bromo-                     |
| 29.168 | 0.03 | 11-Hexacosyne                             |
| 29.407 | 0.15 | Docosanedioic acid, dimethyl ester        |
| 29.459 | 0.03 | Nonacosan-14-one                          |
| 29.559 | 0.06 | Triacontane                               |
| 29.883 | 0.03 | Vitamin E                                 |
| 29.929 | 0.06 | Cholesterol                               |
| 30.049 | 0.03 | Hexadecanoic acid, tetradecyl ester       |
| 30.216 | 0.05 | 1-Decanol, 2-hexyl-                       |
| 30.308 | 0.05 | Cholest-4-en-6-one                        |
| 30.995 | 0.03 | Cholest-4-en-3-one                        |
| 31.044 | 0.08 | 16-Hentriacontanone                       |
| 31.163 | 0.05 | Dotriacontane                             |
| 31.268 | 0.04 | Cholest-7-en-3-ol, 14-methyl-, (3.beta.)- |
| 31.382 | 0.03 | E,E,Z-1,3,12-Nonadecatriene-5,14-diol     |
| 31.61  | 0.17 | .gamma.-Sitosterol                        |
| 31.794 | 0.12 | 1-Decanol, 2-hexyl-                       |
| 32.145 | 0.05 | Olean-12-ene                              |
| 33.175 | 0.09 | Nonacosan-14-one                          |
| 33.312 | 0.03 | Dotriacontane                             |
| 33.726 | 0.03 | Oleyl oleate                              |
| 33.92  | 0.08 | 9-Hexadecenoic acid, eicosyl ester, (Z)-  |
| 34.184 | 0.06 | Hexadecanoic acid, octadecyl ester        |

**Table S9.** Pyro-probe data of <sup>12</sup>C methyl linoleate with catalyst

| <b>Ret time</b> | <b>Area, %</b> | <b>Compound name</b>                    |
|-----------------|----------------|-----------------------------------------|
| 1.883           | 0.4            | 2-Methyl-1-butene                       |
| 2.188           | 0.23           | 1-Pentene, 2-methyl                     |
| 2.276           | 0.63           | 2-Hexene                                |
| 2.344           | 0.38           | Allyl isocyanate                        |
| 2.557           | 0.39           | 1,4-Cyclohexadiene                      |
| 2.653           | 0.22           | Cyclopentene, 4-methyl-                 |
| 2.749           | 0.91           | Benzene                                 |
| 3.03            | 0.15           | 1-Heptene                               |
| 3.174           | 0.48           | Cyclopropane, trimethylmethylene-       |
| 3.314           | 0.05           | 3-Ethylheptanoic acid                   |
| 3.44            | 0.05           | Cyclopentane, ethylidene-               |
| 3.7             | 0.23           | 3-Methylenecyclohexene                  |
| 3.909           | 0.16           | Cyclopentane, ethylidene-               |
| 4.093           | 2.15           | Toluene                                 |
| 4.452           | 0.1            | Cyclopropane, pentyl-                   |
| 4.607           | 0.19           | 1-Heptanol, 2-propyl-                   |
| 4.752           | 0.07           | Cyclohexene, 3-ethyl-                   |
| 5.303           | 0.11           | 2,4-Dimethyl-1-heptene                  |
| 5.669           | 0.82           | Benzene, 1,1'-[oxybis(methylene)]bis-   |
| 5.868           | 1.87           | p-Xylene                                |
| 6.202           | 0.26           | Resin (Styrene, 2-EHA)                  |
| 6.407           | 0.06           | Spiro[4.4]nonan-1-one                   |
| 6.45            | 0.06           | 4-Nonene                                |
| 6.984           | 0.05           | 1-Undecene, 8-methyl-                   |
| 7.309           | 0.32           | Benzeneethanol, .alpha.-(phenylmethyl)- |
| 7.414           | 0.23           | Octane, 2,2,6-trimethyl-                |
| 7.5             | 0.69           | m-Ethylaniline                          |
| 7.952           | 0.08           | 1-Decene                                |
| 8.02            | 0.3            | 2,6-Xylidine                            |
| 8.11            | 0.12           | m-Toluic acid, 3-phenylpropyl ester     |
| 8.318           | 0.19           | E-10-Dodecen-1-ol propionate            |
| 8.484           | 0.06           | 1-Pentanol, 2-ethyl-4-methyl-           |

|        |      |                                                                                             |
|--------|------|---------------------------------------------------------------------------------------------|
| 8.73   | 0.1  | 1H-Indole, 2,3-dihydro-                                                                     |
| 8.893  | 0.11 | 1H-Indene, 1-chloro-2,3-dihydro-                                                            |
| 8.97   | 0.06 | 1,3-Benzodioxole, 3a,7a-dihydro-2,2,4-trimethyl-                                            |
| 9.069  | 0.4  | Tricyclo[4.2.2.0(1,5)]dec-7-ene                                                             |
| 9.627  | 0.16 | 5-Tetradecene, (E)-                                                                         |
| 9.697  | 0.05 | Cyclohexane, 1,1-dimethyl-2-propyl-                                                         |
| 9.83   | 0.09 | Nonanal                                                                                     |
| 9.955  | 0.1  | E-10-Dodecen-1-ol propionate                                                                |
| 10.168 | 0.12 | Z-1,6-Undecadiene                                                                           |
| 10.531 | 0.09 | 4-(3-Pentyl)pyridine                                                                        |
| 10.623 | 0.09 | 1H-Indene, 1-methyl-                                                                        |
| 10.71  | 0.22 | Diazodiamantane                                                                             |
| 11.18  | 0.25 | 2-Decanone                                                                                  |
| 11.507 | 0.06 | E-10-Dodecen-1-ol propionate                                                                |
| 11.635 | 0.06 | Nonanoic acid, methyl ester                                                                 |
| 11.695 | 0.13 | 6-Dodecyne                                                                                  |
| 12.233 | 0.13 | Bicyclo[3.3.1]nonan-3-ol, 7-methylene-                                                      |
| 12.837 | 0.09 | Naphthalene, 2-methyl-                                                                      |
| 13.691 | 0.07 | 3,7-Dimethylenebicyclo[3.3.1]nonane                                                         |
| 14.761 | 0.09 | 1,5-Cyclododecadiene, (E,E)-                                                                |
| 14.878 | 0.05 | Cyclopentene, 1-octyl-                                                                      |
| 15.059 | 0.08 | Bicyclo[3.3.1]nonan-3-ol, 7-methylene-                                                      |
| 15.509 | 0.05 | 7,9-Di-tertbutyl-1-oxaspiro[4,5]deca-6,9-dien-8-one                                         |
| 16.017 | 0.11 | 9,12-Tetradecadien-1-ol, (Z,E)-                                                             |
| 16.134 | 0.1  | 1,16-Hexadecanediol                                                                         |
| 16.298 | 0.05 | 4-Octylaniline                                                                              |
| 16.351 | 0.24 | Bicyclo[3.1.0]hexan-3-ol, 4-methylene-1-(1-methylethyl)-, [1S-(1.alpha.,3.beta.,5.alpha.)]- |
| 17.576 | 0.3  | Bicyclo[3.3.1]nonan-3-ol, 7-methylene-                                                      |
| 18.522 | 0.06 | 3-Eicosyne                                                                                  |
| 19.815 | 0.06 | .alpha.-Phellandrene, dimer                                                                 |
| 19.949 | 0.11 | cis-13-Eicosenoic acid                                                                      |
| 20.91  | 0.15 | cis-10-Heptadecenoic acid, methyl ester                                                     |
| 20.955 | 0.3  | cis-10-Heptadecenoic acid, methyl ester                                                     |
| 21.05  | 0.17 | cis-10-Nonadecenoic acid                                                                    |

|        |       |                                                                                                                                 |
|--------|-------|---------------------------------------------------------------------------------------------------------------------------------|
| 21.15  | 0.37  | cis-10-Heptadecenoic acid, methyl ester                                                                                         |
| 22.454 | 44.32 | Oxacyclohexadecan-2-one                                                                                                         |
| 22.521 | 5.51  | Cyclopropaneundecanal, 2-nonyl-                                                                                                 |
| 22.722 | 18    | Oleyl alcohol, trifluoroacetate                                                                                                 |
| 22.762 | 6.5   | Tetradecanenitrile                                                                                                              |
| 22.832 | 2.55  | Oleic Acid                                                                                                                      |
| 22.904 | 0.37  | Methyl 9-cis,11-trans-octadecadienoate                                                                                          |
| 22.93  | 0.34  | 1-Dodecanol, 2-octyl-, acetate                                                                                                  |
| 22.99  | 0.88  | Linoleic acid ethyl ester                                                                                                       |
| 23.046 | 0.34  | 18-Nonadecenoic acid                                                                                                            |
| 23.08  | 0.12  | Tetrapentacontane, 1,54-dibromo-                                                                                                |
| 23.201 | 0.07  | 10-Undecenoic acid, 2-methoxy-, methyl ester                                                                                    |
| 23.546 | 0.25  | 4H-1,3-Benzodioxin-4-one, 2-(1,1-dimethylethyl)hexahydro-5-methyl-4a-(2-propenyl)-, [2s-(2.alpha.,4a.alpha.,5.beta.,8a.beta.)]- |
| 23.587 | 0.19  | Oxiraneoctanoic acid, 3-octyl-, methyl ester, cis-                                                                              |
| 23.627 | 0.14  | Vinyl caprylate                                                                                                                 |
| 23.698 | 0.24  | Oxiraneoctanoic acid, 3-octyl-, methyl ester                                                                                    |
| 23.759 | 0.89  | 2-Furanoctanoic acid, 5-hexyltetrahydro-, methyl ester                                                                          |
| 23.913 | 0.2   | 9-Hydroxypentadecanoic acid, methyl ester                                                                                       |
| 24.162 | 0.66  | Dodecane, 1,12-di(2-nitro-3-ethoxyphenoxy)-                                                                                     |
| 24.274 | 0.1   | Fumaric acid, 2-octyl tridec-2-yn-1-yl ester                                                                                    |
| 24.371 | 0.07  | Tricyclo[20.8.0.0(7,16)]triacontane, 1(22),7(16)-diepoxy-                                                                       |
| 24.577 | 0.05  | Octadecanoic acid, 9,10-dihydroxy-, methyl ester                                                                                |
| 24.756 | 0.09  | Heptadeca-7,10-dione                                                                                                            |
| 24.88  | 0.2   | Epicedrol                                                                                                                       |
| 25.183 | 0.05  | Octadecanoic acid, 9,10-dihydroxy-, methyl ester                                                                                |
| 25.314 | 1.07  | 13-Docosenoic acid, methyl ester, (Z)-                                                                                          |
| 27.376 | 0.06  | 9-Octadecenamide, (Z)-                                                                                                          |
| 31.578 | 0.06  | (3S,8S,9S,10R,13R,14S,17R)-17-((2R,5R)-5-Ethyl-6-methylheptan-2-yl)-3-methoxy-10,13-dimethyl-2,3,4,7,8,9,10,11,12,13,14,15,16,1 |

**Table S10.** Pyro-probe data of <sup>12</sup>C methyl palmitate with catalyst

| Ret time | Area, % | Compound name                                                                   |
|----------|---------|---------------------------------------------------------------------------------|
| 1.883    | 0.95    | Propane, 1,2-dimethoxy-                                                         |
| 2.19     | 0.13    | Propanedioic acid, propyl-                                                      |
| 2.274    | 0.76    | Ethane, 1,2-diethoxy-                                                           |
| 2.552    | 0.31    | 2-(1-Methylcyclopentyloxy)-tetrahydropyran                                      |
| 2.649    | 0.11    | 2-Propanamine, N,N-dimethyl-                                                    |
| 2.743    | 0.78    | Benzene                                                                         |
| 3.127    | 0.1     | 1,3-Bis(hydroxymethyl)urea                                                      |
| 3.695    | 0.22    | 8-Nonyn-1-ol tetrahydropyran-2-yl ether                                         |
| 4.077    | 2.28    | Mepivacaine                                                                     |
| 4.597    | 0.24    | 1,3-Bis(hydroxymethyl)urea                                                      |
| 4.838    | 0.13    | Cyclotrisiloxane, hexamethyl-                                                   |
| 5.659    | 0.6     | Piperidine, 1-ethyl-                                                            |
| 5.843    | 2.63    | 2,3-Dihydro-6-hydroxy-3-oxo-2-(piperidinomethyl)pyridazine                      |
| 6.197    | 0.13    | 2-(5-Amino-[1,3,4]thiadiazol-2-ylsulfanyl)-1-pyrrolidin-1-yl-ethanone           |
| 6.343    | 0.09    | 1-Nitro-2-propanol                                                              |
| 7.301    | 0.17    | 3-Piperidino-1,2-propanediol                                                    |
| 7.486    | 0.82    | Ribitol, 1,3:4,5-di-O-(ethylboranediyl)-2-deoxy-                                |
| 8.015    | 0.15    | 3,12-Dibora-2,4,11,13-tetraoxatricyclo[12.4.0.0(5,10)]octadecane, 3,12-diethyl- |
| 8.101    | 0.16    | Ethanol, 2,2'-[methylenebis(thio)]bis-                                          |
| 9.058    | 0.29    | Ribitol, 1,3:4,5-di-O-(ethylboranediyl)-2-deoxy-                                |
| 9.619    | 0.11    | d-Galactose oxime                                                               |
| 9.824    | 0.13    | Nonanal                                                                         |
| 10.702   | 0.1     | Boroxin, ethyldimethyl-                                                         |
| 11.186   | 0.14    | 1-Methoxy-3-(trimethylsilyloxymethyl)nonane                                     |
| 12.763   | 0.21    | dl-Threitol                                                                     |
| 12.83    | 0.1     | 6-Methoxynicotinic acid                                                         |
| 14.023   | 0.23    | Methoxyamine, TBDMS derivative                                                  |
| 15.243   | 0.1     | Methoxyamine, TBDMS derivative                                                  |
| 15.415   | 0.09    | dl-Threitol                                                                     |
| 15.465   | 0.09    | Methoxyamine, TBDMS derivative                                                  |

|        |       |                                                       |
|--------|-------|-------------------------------------------------------|
| 19.062 | 0.12  | Propanoic acid, 2-(ethylthio)-, ethyl ester           |
| 20.255 | 50.02 | Bis(dimethylamino)methylphosphine                     |
| 20.365 | 6.55  | Bis(dimethylamino)methylphosphine                     |
| 20.45  | 1.73  | Bis(dimethylamino)methylphosphine                     |
| 20.49  | 2.24  | O-Ethylhydroxylamine, TBDMS derivative                |
| 20.54  | 0.98  | Bis(dimethylamino)methylphosphine                     |
| 20.57  | 0.72  | O-Ethylhydroxylamine, TBDMS derivative                |
| 20.605 | 0.78  | O-Ethylhydroxylamine, TBDMS derivative                |
| 20.665 | 1.86  | Bis(dimethylamino)methylphosphine                     |
| 20.861 | 0.12  | Bis(dimethylamino)methylphosphine                     |
| 21.143 | 0.21  | O-Ethylhydroxylamine, TBDMS derivative                |
| 21.898 | 18.84 | cis-9-Octadecenoic acid, propyl ester                 |
| 22.092 | 1.29  | 1-Methyl-1-(4-methylpentyl)oxy-1-silacyclobutane      |
| 22.252 | 0.18  | 9,12-Octadecadienoic acid (Z,Z)-, methyl ester        |
| 22.66  | 0.35  | trans,trans-9,12-Octadecadienoic acid, propyl ester   |
| 23.406 | 0.09  | Undec-10-ynoic acid, octadecyl ester                  |
| 23.468 | 0.16  | Methyl 2-hydroxydodecanoate                           |
| 23.649 | 0.51  | 15-Tetracosenoic acid, methyl ester, (Z)-             |
| 24.084 | 0.35  | 2-Butyl-3-methyl-5-(2-methylprop-2-enyl)cyclohexanone |
| 25.299 | 0.26  | 13-Docosenoic acid, methyl ester, (Z)-                |
| 26.53  | 0.13  | 1,1'-Biphenyl-3,4,4'-trimethoxy-6'-formyl-            |
| 29.896 | 0.16  | Cholesterol                                           |

## Reference

1. X. Liu, Y. Wu, J. Zhang, Y. Zhang, X. Li, H. Xia and F. Wang, *ACS Omega*, 2022, **7**, 18953-18968.
2. Q. Wu, Y. Wang, Y. Peng, L. Ke, Q. Yang, L. Jiang, L. Dai, Y. Liu, R. Ruan, D. Xia and L. Jiang, *Energy Conversion and Management*, 2020, **220**, 113124.
3. Q. Wu, Y. Wang, Y. Peng, L. Ke, Q. Yang, L. Jiang, L. Dai, Y. Liu, R. Ruan, D. Xia and L. Jiang, *Energy Conversion and Management*, 2020, **220**.
4. Y. Zeng, Y. Wang, Y. Liu, L. Dai, Q. Wu, M. Xia, S. Zhang, L. Ke, R. Zou and R. Ruan, *Science of The Total Environment*, 2022, **809**, 152182.
5. Y. Wang, Y. Zeng, L. Fan, Q. Wu, L. Zhang, J. Xiong, J. Zhang, R. Liao, K. Cobb, Y. Liu, R. Ruan and Y. Wang, *Fuel*, 2023, **351**.
6. L. Fan, R. Ruan, J. Li, L. Ma, C. Wang and W. Zhou, *Applied Energy*, 2020, **263**.
7. L. Fan, R. Ruan, J. Li, L. Ma, C. Wang and W. Zhou, *Applied Energy*, 2020, **263**, 114629.
8. D. Kumar and K. K. Pant, *Renewable Energy*, 2016, **95**, 43-52.
9. A. Ben Hassen Trabelsi, K. Zaafouri, W. Baghdadi, S. Naoui and A. Ouerghi, *Renewable Energy*, 2018, **126**, 888-896.
10. F. Wang, Y. Zheng, Y. Huang, X. Yang, G. Xu, J. Kang, C. Liu and Z. Zheng, *Journal of Analytical and Applied Pyrolysis*, 2017, **126**, 180-187.
11. X. Zhao, L. Wei, S. Cheng, Y. Cao, J. Julson and Z. Gu, *Applied Catalysis A: General*, 2015, **507**, 44-55.
